# Supplementary material
Source: MDPI journal article supplement (https://www.mdpi.com/1424-8247/15/9/1052)
Supplement: s1 [file s1]

Supplementary figures for

Original article

# Licochalcone B, a Natural Autophagic Agent for Alleviating Oxidative Stress-Induced Cell Death in Neuronal Cells and *Caenorhabditis elegans* Models

Liqun Qu <sup>1,†</sup>, Jianhui Wu <sup>1,†</sup>, Yong Tang <sup>1,2</sup>, Xiaoyun Yun <sup>1</sup>, Hang Hong Lo <sup>1</sup>, Lu Yu <sup>2</sup>, Wenhua Li <sup>3</sup>, Anguo Wu <sup>2,\*</sup> and Betty Yuen Kwan Law <sup>1,\*</sup>

<sup>1</sup> Neher's Biophysics Laboratory for Innovative Drug Discovery, State Key Laboratory of Quality Research in Chinese Medicine, Macau University of Science and Technology, Macau 999078, China

<sup>2</sup> Sichuan Key Medical Laboratory of New Drug Discovery and Druggability Evaluation, School of Pharmacy, Southwest Medical University, Luzhou 646000, China

<sup>3</sup> Hubei Key Laboratory of Cell Homeostasis, College of Life Sciences, Wuhan University, Wuhan 430072, China

\* Correspondence: wuanguo@swmu.edu.cn (A.W.); yklaw@must.edu.mo (B.Y.K.L.)

† These authors contributed equally to this work.

# Supplementary Figure S1. Establishment of cellular oxidative stress models

(A) Cell viability of PC-12 cells treated with 0 to 40  $\mu$ M of LCB for 24 h were measured by MTT assay. (B) Cell viability, (C) LDH level and (D) Caspase-3 activity were measured in  $H_2O_2$  (900  $\mu$ M) induced PC-12 cells for 6 h after LCB (10, 20 or 40  $\mu$ M) pre-treatment for 16 h. ###P<0.001,  $H_2O_2$  group vs control; \*\*\* P<0.001,  $H_2O_2$  +LCB group vs  $H_2O_2$  group. (E) Cellular morphological changes were evaluated in  $H_2O_2$  (900  $\mu$ M) induced PC-12 cells for 6 h after pretreatment of LCB for 16 h as indicated. Scale bar =50  $\mu$ m. (F) Calcein/PI assay was adopted to perform the ICC staining in  $H_2O_2$  (900  $\mu$ M) induced PC-12 cells for 6 h after pretreatment of LCB for 16 h as indicated. Scale bar =50  $\mu$ m.

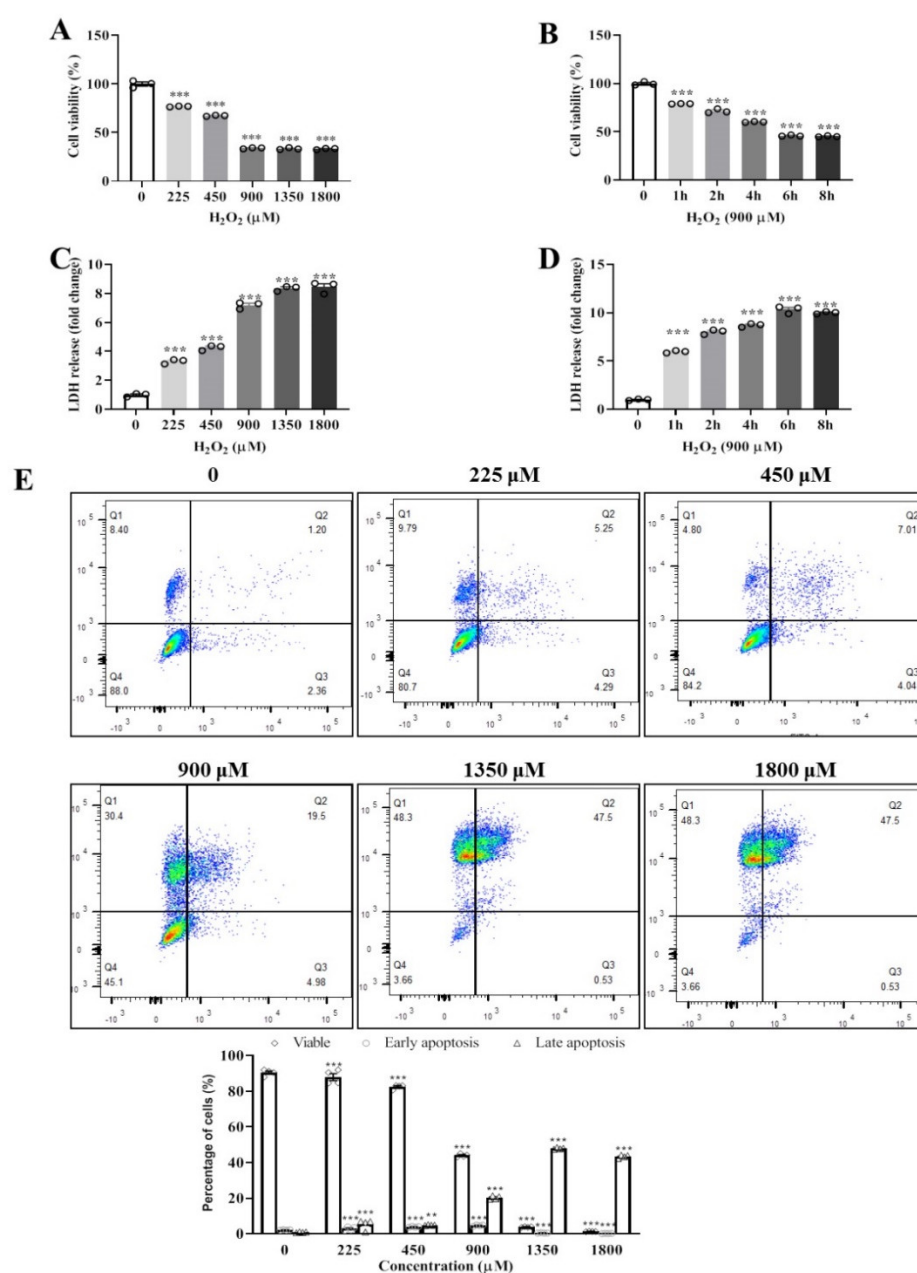

Fig. S1 The establishment of H<sub>2</sub>O<sub>2</sub>-induced cell death model

**Supplementary Figure S2. DCFH-DA assay for the measurement of ROS level**

PC-12 cells were pretreated with 25  $\mu$ M of LCB for 16 h before the exposure of 900  $\mu$ M H<sub>2</sub>O<sub>2</sub> for 1 h. Intracellular ROS production was determined by using the 10  $\mu$ M DCFH-DA assay. Scale bar= 50  $\mu$ m.

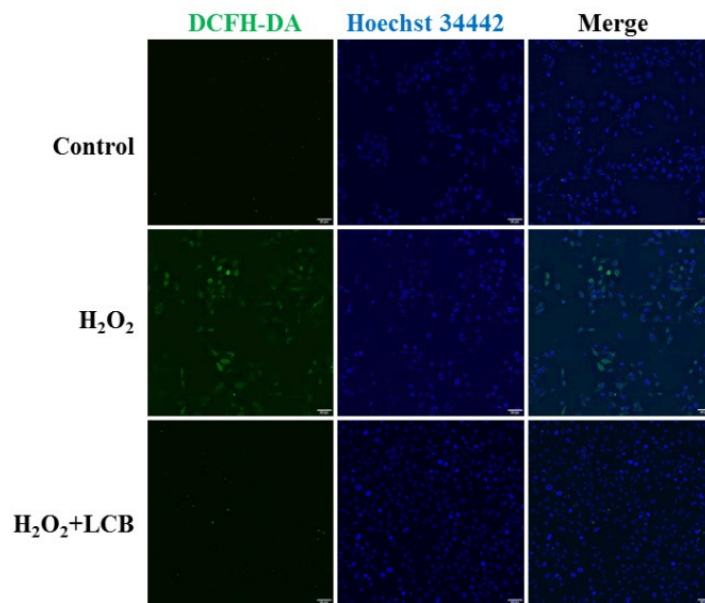

Fig. S2 Effect of LCB on H<sub>2</sub>O<sub>2</sub>-induced oxidative stress in PC-12 cells

**Supplementary Figure S3. Western blot for protein expression of caspase 3**  
PC-12 cells were pretreated with LCB (10 to 40  $\mu$ M) for 16 h before subjected to 900  $\mu$ M  $H_2O_2$  for 6h. Western blot analysis was used to detect the level of cleaved or total caspase 3 protein expression, ### $P<0.001$ ,  $H_2O_2$  group vs control; \*\*\*  $P<0.001$ ,  $H_2O_2$  +LCB group vs  $H_2O_2$  group.

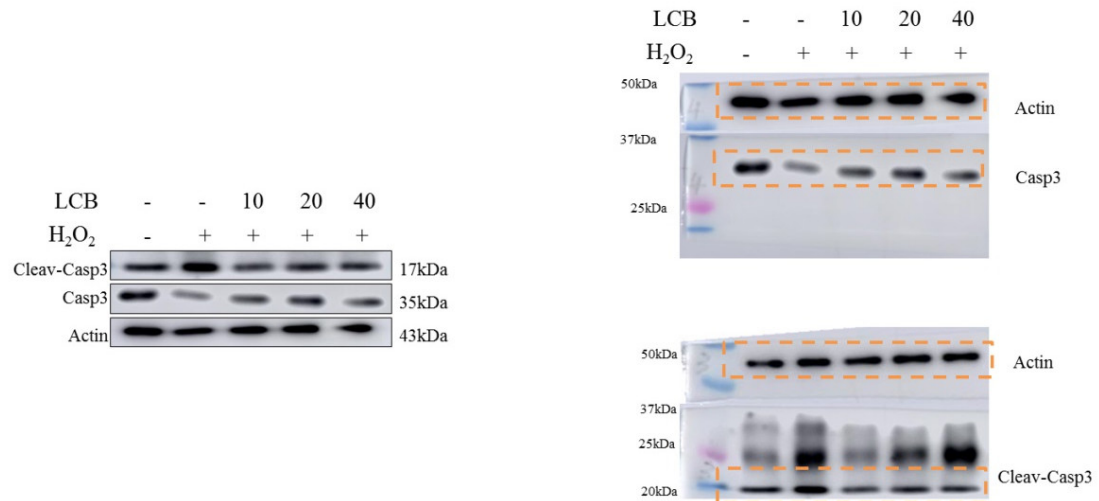

Fig. S3 LCB protected PC-12 cells from apoptosis induced by  $H_2O_2$

**Supplementary Figure S4. Western blot for protein expression of LC3 I/II**  
 GFP-LC3-U87 cells were exposed to various concentrations of LCB (10 to 40  $\mu$ M) for 24 h as indicated. Western blot for the expression of LC3-II/I after treatment of LCB or rapamycin for 24 h. \*  $P<0.01$ , \*\*\*  $P<0.001$ .

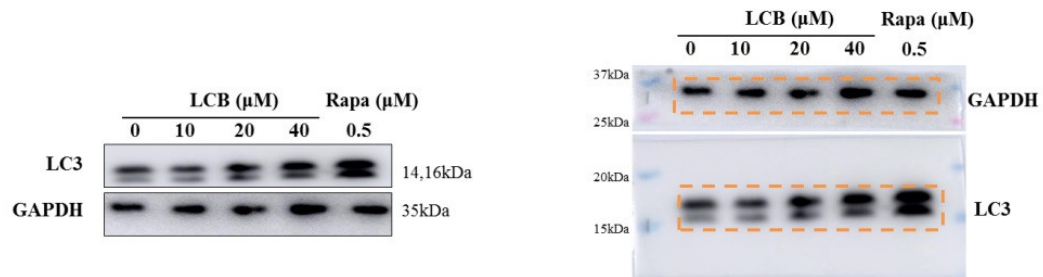

Fig. S4 LCB induced autophagy in GFP-LC3-U87 cells

**Supplementary Figure S5. Mechanistic study on LCB by Western blot.**

(A) PC-12 cells were treated with LCB under the indicated concentrations for 24 h. After treatment, cell lysates were harvested for the analysis of SIRT1, P-AMPK, Beclin1, and p62 by Western blot. (B) PC-12 cells were treated with LCB with or without the presence of CC under the indicated concentrations for 24 h. After treatment, cell lysates were harvested for the analysis of SIRT1, P-AMPK, and p62 and LC3 by Western blot.

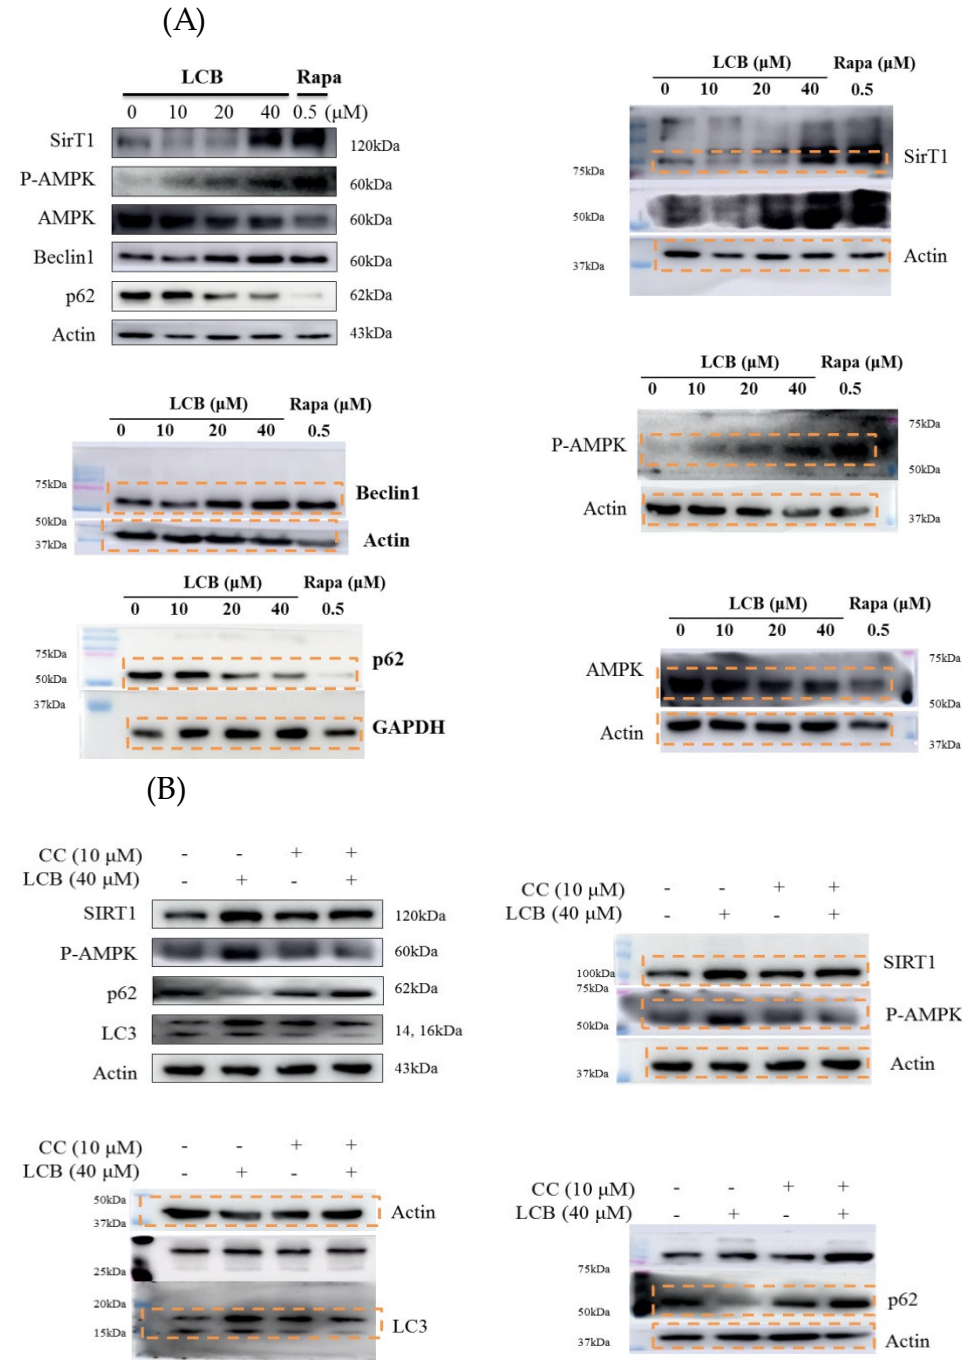

Fig.S5 LCB activated autophagy via the AMPK/SIRT1 signaling pathway in PC-12 cells

### Supplementary Figure S6. MDC assay for autophagy detection

PC-12 cells were pretreated with 10 to 40  $\mu\text{M}$  of LCB for 16 h before the exposure to 900  $\mu\text{M}$   $\text{H}_2\text{O}_2$  for 6 h. MDC staining buffer was added and incubated with cells for 30 min at 37°C incubator protected from light. \*\*\*  $p < 0.001$ .

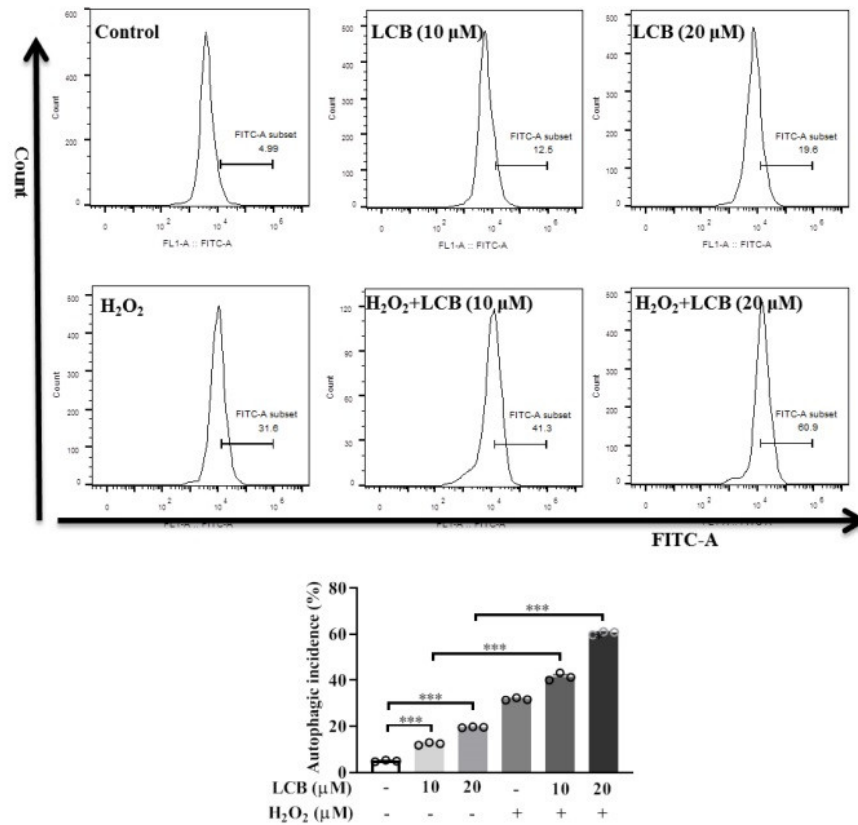

Fig.S6 The induction of autophagy in LCB treated  $\text{H}_2\text{O}_2$ -induced PC-12 cells by MDC staining and flow analysis
